# Supplementary material for: Kinetic analysis of the asymmetric hydrogenation of (E)-2,3-diphenylpropenoic acid over cinchonidine derivative-modified Pd/C: quinoline ring modification
Source: Royal Society of Chemistry journal article supplement (doi:10.1039/d0cy01380c), 2020-01-01
Supplement: d0cy01380c1.pdf [file d0cy01380c1.pdf]

## Supplementary Information

### **Kinetic Analysis of the Asymmetric Hydrogenation of (*E*)-2,3-diphenylpropenoic acid over Cinchonidine Derivative-Modified Pd/C: Quinoline Ring Modification**

Makoto Nakatsuji, Morifumi Fujita, Yasuaki Okamoto,\* Takashi Sugimura\*

Graduate School of Material Science, University of Hyogo, Kohto, Kamigori, Hyogo  
678-1297, Japan

\*E-mail: [sugimura@sci.u-hyogo.ac.jp](mailto:sugimura@sci.u-hyogo.ac.jp) (TS), [yokamoto@sci.u-hyogo.ac.jp](mailto:yokamoto@sci.u-hyogo.ac.jp) (YO)

### Derivations of Kinetic Equations

Kinetic equations in the text are presented in our previous study.<sup>1</sup> The surface coverage of the modifier, for example, is shown by Eq. (S1), neglecting the term of adsorbed products because of the initial stage of the reaction concerned.

$$\theta_M = K_M C_M / (1 + K_M C_M + K_S C_S + K_A C_A + K_H^{1/2} P_H^{1/2}) \quad (\text{S1})$$

where  $\theta$ ,  $K$ ,  $C$ , and  $P$  represent the surface coverage, equilibrium adsorption constant, concentration, and pressure, respectively. The subscripts, M, S, A, and H show the modifier, substrate, benzylamine, and hydrogen, respectively. Assuming the formation of the modifier-substrate 1:1 interaction complex, the surface coverage of the interaction complex ( $\theta_{MS}$ ) can be simply expressed by Eq. (S2) instead of  $\theta_M \theta_S$  used in other research groups. This is a novel kinetic model in the present study, leading to much simplified formulation.

$$\theta_{MS} = \theta_M [K_{MS} C_S / (1 + K_{MS} C_S)]$$

$$= [K_M C_M / (1 + K_M C_M + K_S C_S + K_A C_A + K_H^{1/2} P_H^{1/2})] \times [K_{MS} C_S / (1 + K_{MS} C_S)] \quad (S2)$$

where  $K_{MS}$  shows the equilibrium adsorption constant of the substrate on the preadsorbed modifier to form a modifier-substrate complex through hydrogen bonding. Thus, the initial reaction rates at the modified sites ( $r_m$ ) and unmodified sites ( $r_u$ ) can be described as follows, assuming that in the presence of BA the rate determining steps are the addition of a dissociatively adsorbed surface hydrogen atom to the modifier-substrate complex and adsorbed substrate for the enantioselective and racemic hydrogenations, respectively.

$$\begin{aligned} r_m &= k_m \theta_{MS} \theta_H \\ &= [k_m K_M C_M (K_H P_H)^{1/2} / (1 + K_M C_M + K_S C_S + K_A C_A + K_H^{1/2} P_H^{1/2})^2] \times [K_{MS} C_S / (1 + K_{MS} C_S)] \end{aligned} \quad (S3)$$

$$\begin{aligned} r_u &= k_u \theta_S \theta_H \\ &= k_u K_S C_S (K_H P_H)^{1/2} / (1 + K_M C_M + K_S C_S + K_A C_A + K_H^{1/2} P_H^{1/2})^2 \end{aligned} \quad (S4)$$

where  $k_m$  and  $k_u$  are the rate constants for the selective and nonselective hydrogenations, respectively. Thus, observed enantioselectivity, as represented by  $ee$ , can be described by Eq. (S6)

$$\begin{aligned} r_m / (r_m + r_u) &= [k_m K_M C_M K_{MS} / (1 + K_{MS} C_S)] / [k_m K_M C_M K_{MS} / (1 + K_{MS} C_S) + k_u K_S] \\ &= 1 / (1 + \beta / C_M) \end{aligned} \quad (S5)$$

where  $\beta = (k_u / k_m) (K_S / K_M) (1 + K_{MS} C_S) / K_{MS}$

$$\begin{aligned} ee &= i^e r_m / (r_m + r_u) \\ &= i^e / (1 + \beta / C_M) \end{aligned} \quad (S6)$$

where the intrinsic enantioselectivity,  $i^e$ , is defined by the enantiomeric excess ( $ee$ ) of the hydrogenation at the modified sites;  $i^e = | [S]_m - [R]_m | / ([S]_m + [R]_m)$ .  $[S]_m$  and  $[R]_m$  represent the amounts of the *S*- and *R*-enantiomers, respectively.

The reaction rate  $r_m$  at the modified sites shows a maximum  $r_m^*$  at a certain

concentration of the modifier,  $C_M^*$ . From  $dr_m/dC_M = 0$ , we can obtain the concentration of the modifier  $C_M^*$  for  $r_m^*$ .

$$C_M^* = \alpha/K_M \quad (S7)$$

where  $\alpha = 1 + K_S C_S + K_A C_A + K_H^{1/2} P_H^{1/2}$

Equation (S7) predicts that  $C_M^*$  is inversely proportional to the adsorption constant of the modifier.

#### Reference

- [1] B. Kim, M. Nakatsuji, T. Mameda, T. Kubota, M. Fujita, T. Sugimura, Y. Okamoto, *Bull. Chem. Soc. Jpn.*, 2020, **93**, 163-175.

## Kinetic Analysis of CD-Ph, CD-6'OH, QN, and QN-Me

We applied Eq. (3) or Eq. (S6) to the analysis of the observed enantioselectivity in Figs 2 and 3 for the asymmetric hydrogenation of PCA over CD derivative-modified Pd/C to estimate the intrinsic enantioselectivity  $i^e$  and the kinetic parameter  $\beta$  in a logarithm scale. Figure S1 illustrates  $\log ee/(i^e - ee)$  against  $\log C_M$  for the modifier after choosing appropriate value of  $i^e$ .

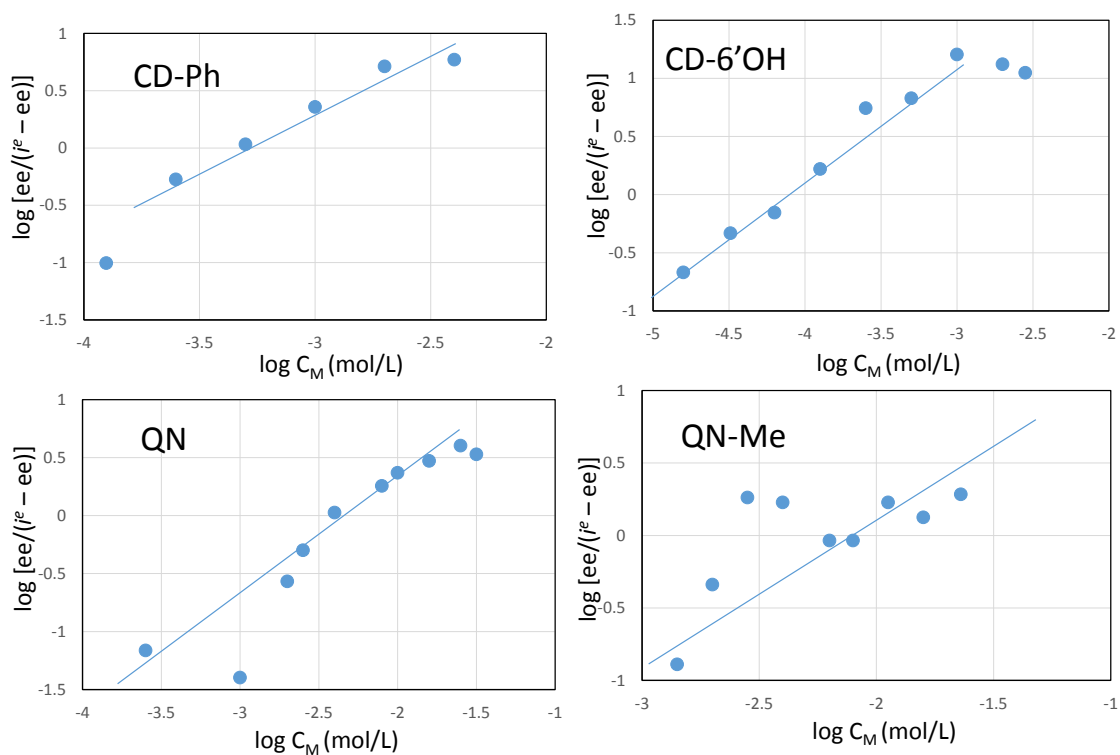

Figure S1. Correlation between  $\log [ee/(i^e - ee)]$  and  $\log C_M$  for CD-Ph, CD-vinyl, QN, and QN-Me. The linear line in the plot is a hypothetical line with a slope of unity according to Eq. (3) or Eq. (S6). The values of  $i^e$  and  $\log \beta$  thus obtained are listed in Table 2.

## Synthesis and Chemical Data of CD-vinyl

CD-vinyl

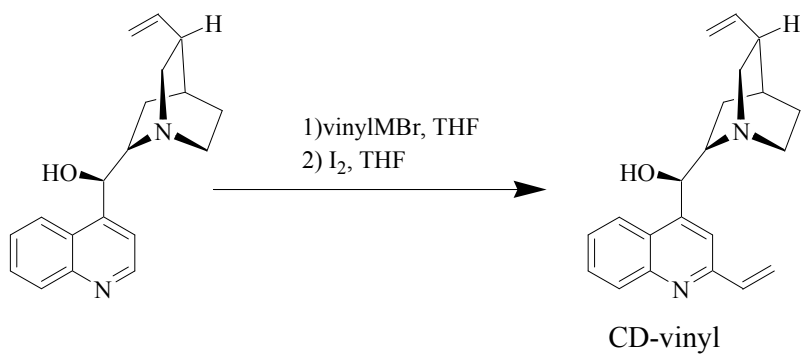

Colorless solid: mp. 236.8-237.2 °C, <sup>1</sup>H NMR (CDCl<sub>3</sub>, 600MHz) δ 8.03 (d, *J* = 7.6 Hz, 1H), 7.88 (d, *J* = 7.6 Hz, 1H), 7.75 (s, 1H), 7.62 (t, *J* = 7.6 Hz, 1H), 7.37 (t, *J* = 7.6 Hz, 1H), 6.97 (dd, *J* = 17.9, 10.3 Hz, 1H), 6.26 (d, *J* = 17.9 Hz, 1H), 5.70 (m, 1H), 5.59–5.61 (m, 2H), 4.94–4.86 (m, 2H), 3.47 (m, 1H), 3.11–3.04 (m, 2H), 2.67–2.61 (m, 2H), 2.23 (br, 1H), 1.81–1.67 (m, 4H), 1.51–1.41 (m, 2H), HRMS (ESI) *m/z* (M+H<sup>+</sup>) calcd for C<sub>21</sub>H<sub>25</sub>N<sub>2</sub>O 321.20 found 321.20.
